# Supplementary material for: The mitochondrial HSP90 paralog TRAP1 forms an OXPHOS-regulated tetramer and is involved in mitochondrial metabolic homeostasis
Source: PubMed Central journal article supplement (PMC6986101; doi:10.1186/s12915-020-0740-7), 2020-01-27

# Figure S5

**a**

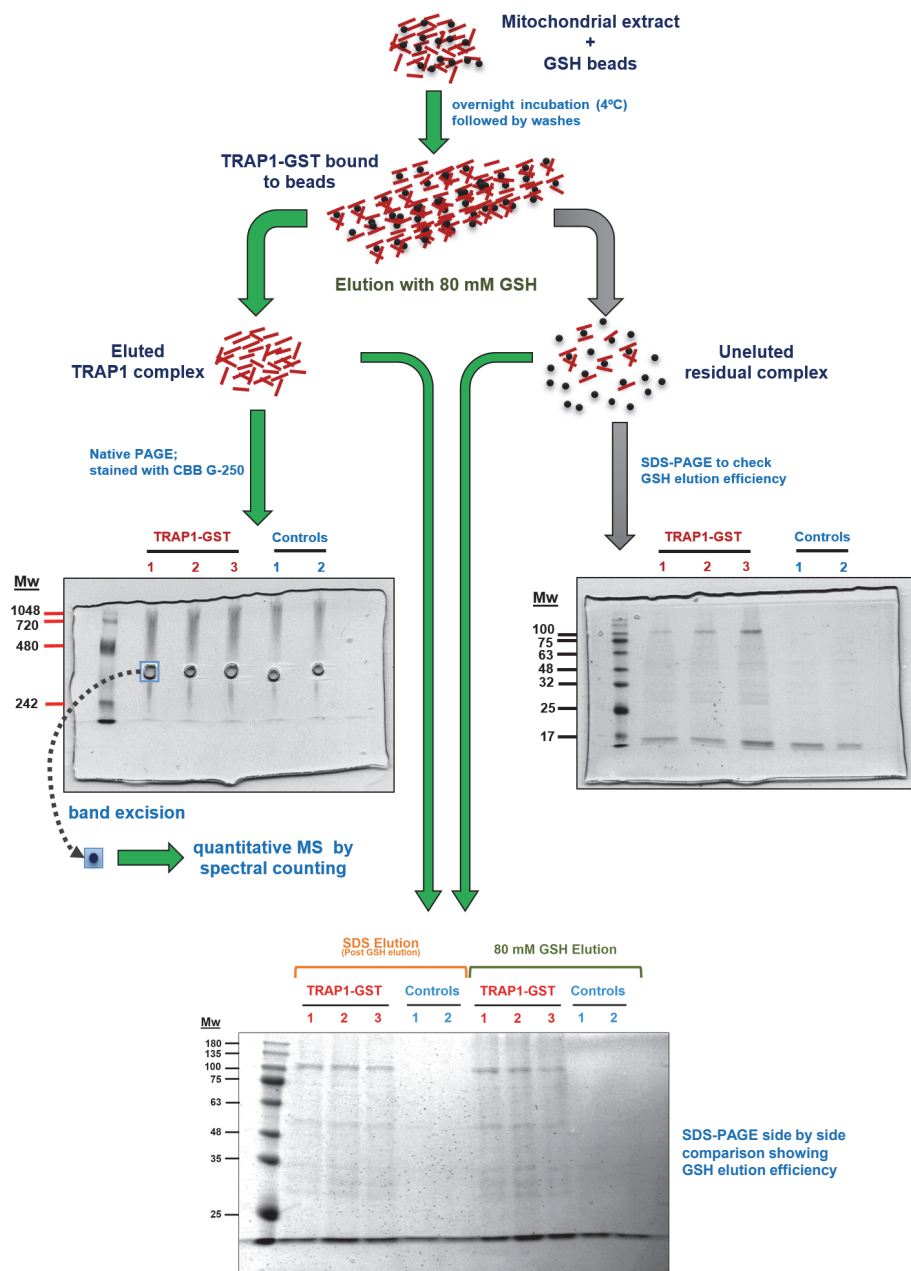

**c**

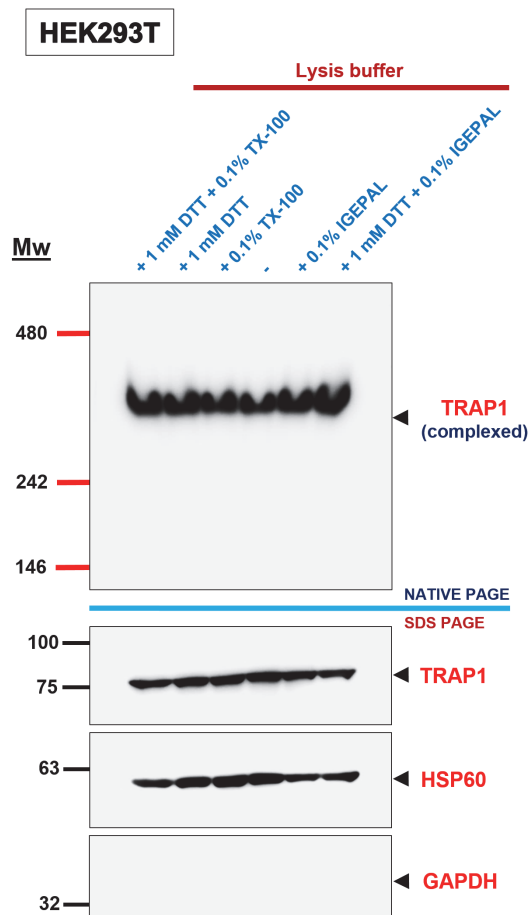

**b**

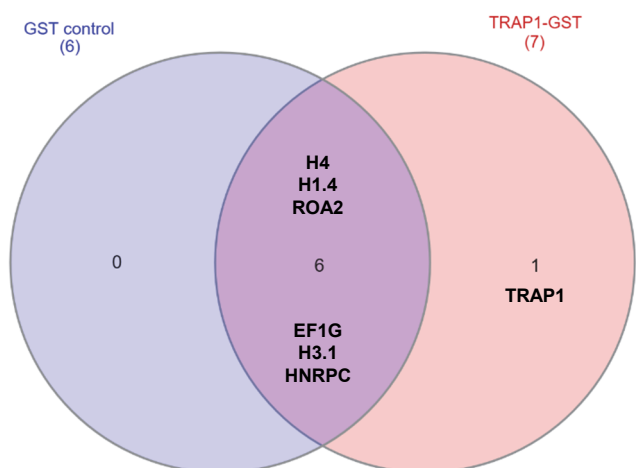

Supplement: 12915_2020_740_MOESM12_ESM.pdf [file 12915_2020_740_MOESM12_ESM.pdf]
